# Supplementary material
Source: HighWire-hosted journal article supplement (https://erj.ersjournals.com/content/51/6/1800255)
Supplement: inline-supplementary-material-1 [file inline-supplementary-material-1.pdf]

E-supplement

**Table E1. Criteria for Independent Adjudication of ILD diagnosed at non-tertiary centers.\*\***

|                                                                                                                                                | Frequency |
|------------------------------------------------------------------------------------------------------------------------------------------------|-----------|
| Thoracic CT scan report noting honeycombing or traction bronchiectasis                                                                         | 245       |
| Thoracic CT scan report noting reticulation and ground glass opacities                                                                         | 96        |
| Thoracic CT scan report noting reticulation; and patient requires supplemental oxygen                                                          | 43        |
| Thoracic CT scan report noting reticulation; and pulmonary crackles on physical examination                                                    | 104       |
| Thoracic CT scan report noting ground glass opacities, pulmonary crackles on examination and moderate to severe restrictive PFT pattern        | 107       |
| Thoracic CT scan report noting ground glass opacities, patient requires supplemental oxygen and has moderate to severe restrictive PFT pattern | 55        |
| Thoracic CT scan report noting ground glass opacities, and DLCO below 50% predicted                                                            | 109       |
| Pulmonary crackles on examination and moderate or severe restrictive PFT pattern                                                               | 244       |
| Moderate or severe restrictive PFT pattern and DLCO below 70%                                                                                  | 317       |
| Pulmonary crackles, patient requires supplemental oxygen and DLCO below 50%                                                                    | 72        |

\*All patients performed Chest-CT scan, pulmonary function tests, and were subsequently diagnosed with ILD after pulmonologist evaluation at the non-tertiary center

#Participants were eligible for more than one criterion

**Table E2. Unadjusted and Adjusted Odds Ratio of ILD sub-category diagnosis Among African-American Patients with Multidisciplinary (MDD) and adjudicated diagnosis of ILD**

| Characteristics                           | Tertiary Referral Medical Center<br>(n=1,152) |             |         | Non-Tertiary Academic Medical Centers<br>(n=488) |              |         | Pooled Population<br>(n=1,640) |             |         |
|-------------------------------------------|-----------------------------------------------|-------------|---------|--------------------------------------------------|--------------|---------|--------------------------------|-------------|---------|
|                                           | OR                                            | 95% CI      | P-value | OR                                               | 95% CI       | P-value | OR                             | 95% CI      | P-value |
| <i>Univariate Logistic Regression</i>     |                                               |             |         |                                                  |              |         |                                |             |         |
| IPF                                       | 0.23                                          | 0.14 – 0.36 | <0.001  | 0.20                                             | 0.08 – 0.48  | <0.001  | 0.18                           | 0.12 – 0.28 | <0.001  |
| CHP                                       | 0.27                                          | 0.13 – 0.57 | <0.001  | --                                               | --           | --      | 0.34                           | 0.17 – 0.71 | 0.004   |
| IPAF                                      | 1.19                                          | 0.78 – 1.80 | 0.414   | 2.49                                             | 0.30 – 21.04 | 0.401   | 1.56                           | 1.04 – 2.34 | 0.030   |
| CTD-ILD                                   | 5.57                                          | 4.01 – 7.75 | <0.001  | 8.73                                             | 2.50 – 30.49 | 0.001   | 6.88                           | 5.04 – 9.39 | <0.001  |
| Unclassifiable/Others                     | 0.76                                          | 0.51 – 1.14 | 0.187   | 2.90                                             | 1.32 – 6.35  | 0.008   | 0.87                           | 0.62 – 1.23 | 0.430   |
| <i>Multivariable Logistic Regression*</i> |                                               |             |         |                                                  |              |         |                                |             |         |
| IPF                                       | 0.29                                          | 0.17 – 0.50 | <0.001  | 0.19                                             | 0.08 – 0.48  | <0.001  | 0.21                           | 0.13 – 0.32 | <0.001  |
| CHP**                                     | 0.19                                          | 0.09 – 0.43 | <0.001  | --                                               | --           | --      | 0.28                           | 0.12 – 0.62 | 0.002   |
| IPAF                                      | 1.15                                          | 0.73 – 1.83 | 0.540   | 1.22                                             | 0.11 – 13.27 | 0.871   | 1.66                           | 1.07 – 2.58 | 0.023   |
| CTD-ILD                                   | 4.48                                          | 2.97 – 6.76 | <0.001  | 6.59                                             | 1.63 – 26.70 | 0.008   | 6.28                           | 4.32 – 9.12 | <0.001  |
| Unclassifiable/Others                     | 0.98                                          | 0.41 – 2.31 | 0.961   | 1.68                                             | 0.71 – 3.99  | 0.238   | 0.86                           | 0.52 – 1.42 | 0.556   |

\*Adjusted for age, gender, body mass index, smoking status, co-morbid diseases and referral status

\*\*Regression estimates incalculable due to decreased subgroup numbers at the non-tertiary medical centers

**Table E3. Sensitivity Analysis Evaluating Association between African-American Race, Mortality, All-Cause Hospitalizations, and Respiratory Hospitalizations in Patients with Code-based ILD (n=9,503)**

| Characteristics                            | Tertiary Referral Medical Center |                        |                | Non-Tertiary Academic Medical Centers |                        |                | Pooled Population  |                        |                |
|--------------------------------------------|----------------------------------|------------------------|----------------|---------------------------------------|------------------------|----------------|--------------------|------------------------|----------------|
|                                            | AA patients                      | Non-AA Patients        | P value        | AA patients                           | Non-AA patients        | P Value        | AA patients        | Non-AA patients        | P value        |
| <b>ICD-9 code diagnosis of ILD, n (%)</b>  | 2297(44.2)                       | 2895 (55.8)            | --             | 251 (5.8)                             | 4060 (94.2)            | --             | 2548 (26.8)        | 6955 (73.2)            | --             |
| Mean survival time, (95% CI), months       | 102 (100 – 104)                  | 101 (100 – 103)        | 0.466          | 104 (97 – 111)                        | 88 (86 – 90)           | <0.001         | 102 (100 – 104)    | 95 (94 – 96)           | <0.001         |
| Mortality, No. (%)                         | 527 (22.9)                       | 660 (22.8)             | 0.923          | 43 (17.0)                             | 1276 (31.4)            | <0.001         | 570 (22.3)         | 1936 (27.8)            | <0.001         |
| Lung transplantation, No. (%)              | 13 (0.6)                         | 38 (1.3)               | 0.007          | 0 (0.4)                               | 2 (0.05)               | 0.725          | 13 (0.5)           | 40 (0.6)               | 0.707          |
| <b>Propensity Score Models<sup>#</sup></b> | <b>HR</b>                        | <b>95% CI</b>          | <b>P Value</b> | <b>HR</b>                             | <b>95% CI</b>          | <b>P Value</b> | <b>HR</b>          | <b>95% CI</b>          | <b>P value</b> |
| Unadjusted model                           | 0.76                             | 0.60-0.97              | 0.025          | 0.66                                  | 0.42-1.06              | 0.084          | 0.72               | 0.55-0.82              | 0.002          |
| Adjusted model*                            | 0.63                             | 0.44-0.91              | 0.013          | 0.88                                  | 0.50-1.56              | 0.674          | 0.60               | 0.44-0.81              | 0.001          |
| Plus referral status                       | 0.63                             | 0.44-0.91              | 0.014          | 0.91                                  | 0.51-1.62              | 0.081          | 0.59               | 0.43-0.80              | 0.001          |
| Plus immunosuppressive therapy             | 0.64                             | 0.45-0.92              | 0.017          | 0.89                                  | 0.50-1.59              | 0.697          | 0.59               | 0.43-0.81              | 0.001          |
| Plus income level                          | 0.67                             | 0.46-0.98              | 0.037          | 0.87                                  | 0.47-1.59              | 0.647          | 0.60               | 0.43-0.83              | 0.002          |
| Plus insurance type                        | 0.68                             | 0.46-0.99              | 0.044          | 0.90                                  | 0.49-1.64              | 0.724          | 0.59               | 0.43-0.83              | 0.002          |
| <b>All-Cause Hospitalizations</b>          | <b>AA patients</b>               | <b>Non-AA Patients</b> | <b>P value</b> | <b>AA patients</b>                    | <b>Non-AA patients</b> | <b>P Value</b> | <b>AA patients</b> | <b>Non-AA patients</b> | <b>P value</b> |
| Number of hospitalized patients, n (%)     | 986 (42.9)                       | 804 (27.8)             | <0.001         | 240 (95.6)                            | 3611 (88.9)            | <0.001         | 1226 (48.1)        | 4415 (63.5)            | <0.001         |
| Risk of hospitalization, OR                | 1.96                             | --                     | <0.001         | 2.71                                  | --                     | <0.001         | 0.53               | --                     | <0.001         |
| Hospitalizations per patient**, IRR (SE)   | 1.20                             | --                     | 0.001          | 0.71                                  | --                     | <0.001         | 0.95               | --                     | 0.231          |

\* adjusted for baseline demographic characteristics - age, gender, body mass index, smoking status, co-morbid diseases (coronary artery disease, gastroesophageal reflux, diabetes mellitus), geographical residence, and ILD subtype.

# after propensity score matching, n=2471 in pooled population; tertiary medical center, n=2039 (AA=1480, non-AA=559); non-tertiary medical center, n=432 (AA=210, non-AA=222 )

ILD=interstitial lung disease; GAP=gender, age, physiology; OR=log odds ratio; IRR=incidence rate ratio; IQR=interquartile range; SE=standard error

\*\*evaluated among hospitalized patients

**Table E4. Sensitivity Analysis Adjusting Propensity Score for Co-morbid diseases, Use of Antifibrotic, ANA seropositivity, Total Lung Capacity, Six-minute Walk Distance, and Radiologic Honeycomb Fibrosis in Patients with Multidisciplinary and adjudicated ILD**

| Propensity Score Models <sup>#</sup> | Tertiary Referral Medical Center |           |         | Non-Tertiary Academic Medical Centers |           |         | Pooled Population |           |         |
|--------------------------------------|----------------------------------|-----------|---------|---------------------------------------|-----------|---------|-------------------|-----------|---------|
|                                      | HR                               | 95% CI    | P Value | HR                                    | 95% CI    | P Value | HR                | 95% CI    | P value |
| Unadjusted model                     | 0.48                             | 0.30-0.78 | 0.003   | 0.67                                  | 0.15-2.92 | 0.593   | 0.51              | 0.32-0.80 | 0.004   |
| Adjusted model*                      | 0.43                             | 0.25-0.72 | 0.002   | 0.43                                  | 0.09-2.16 | 0.305   | 0.48              | 0.29-0.79 | 0.004   |
| Plus referral status                 | 0.43                             | 0.25-0.73 | 0.002   | 0.43                                  | 0.09-2.16 | 0.305   | 0.48              | 0.29-0.79 | 0.004   |
| Plus immunosuppressive therapy       | 0.43                             | 0.25-0.73 | 0.002   | 0.42                                  | 0.08-2.17 | 0.303   | 0.48              | 0.29-0.79 | 0.004   |
| Plus income level                    | 0.43                             | 0.25-0.73 | 0.002   | 0.36                                  | 0.07-1.95 | 0.238   | 0.47              | 0.29-0.78 | 0.003   |
| Plus insurance type                  | 0.43                             | 0.25-0.73 | 0.002   | 0.32                                  | 0.07-1.61 | 0.168   | 0.46              | 0.28-0.77 | 0.003   |
| Plus antifibrotic therapy            | 0.43                             | 0.25-0.74 | 0.002   | 0.19                                  | 0.02-1.65 | 0.133   | 0.45              | 0.27-0.74 | 0.002   |
| Plus ANA seropositivity              | 0.35                             | 0.19-0.65 | 0.001   | --                                    | --        | --      | 0.34              | 0.19-0.60 | <0.001  |
| Plus total lung capacity             | 0.34                             | 0.18-0.64 | 0.001   | --                                    | --        | --      | 0.32              | 0.18-0.57 | <0.001  |
| Plus six-minute walk distance        | 0.28                             | 0.15-0.54 | <0.001  | --                                    | --        | --      | 0.29              | 0.15-0.5  | <0.001  |
| Plus honeycomb fibrosis              | 0.31                             | 0.17-0.58 | <0.001  | --                                    | --        | --      | 0.32              | 0.18-0.60 | <0.001  |

\* adjusted for baseline demographic characteristics – body mass index, age, gender, percent predicted forced vital capacity, percent predicted diffusing capacity of the lung for carbon monoxide, and ILD subtype; GAP-ILD score.

# after propensity score matching, after propensity score matching, n=306 in pooled population; tertiary medical center, n=262 (AA=156, non-AA=106); non-tertiary medical center, n=44 (AA=24, non-AA=20). ILD=interstitial lung disease; OR=log odds ratio; IRR=incidence rate ratio; IQR=interquartile range; SE=standard error

**Table E5. Causes of Respiratory-related Hospitalizations among patients with Multidisciplinary (MDD) and adjudicated ILD diagnosis.#**

|                                                        | Frequency |
|--------------------------------------------------------|-----------|
| Other respiratory worsening                            |           |
| Increased dyspnea                                      | 331       |
| Hypoxia                                                | 237       |
| Respiratory distress                                   | 242       |
| Other unclassifiable acute respiratory worsening       | 104       |
| Respiratory-tract infection or pneumonia               | 115       |
| Respiratory failure (requiring mechanical ventilation) | 86        |
| COPD exacerbation                                      | 31        |
| Elective admission for lung biopsy*                    | 128       |
| Acute exacerbation of ILD (physician diagnosed)        | 139       |
| Pneumothorax                                           | 9         |
| Aspiration event                                       | 6         |
| Pulmonary embolism                                     | 16        |
| Elective admission for lung transplantation*           | 33        |
| Pulmonary hypertension                                 | 20        |

\*Not included in respiratory hospitalization

#Participants were eligible for more than one criterion

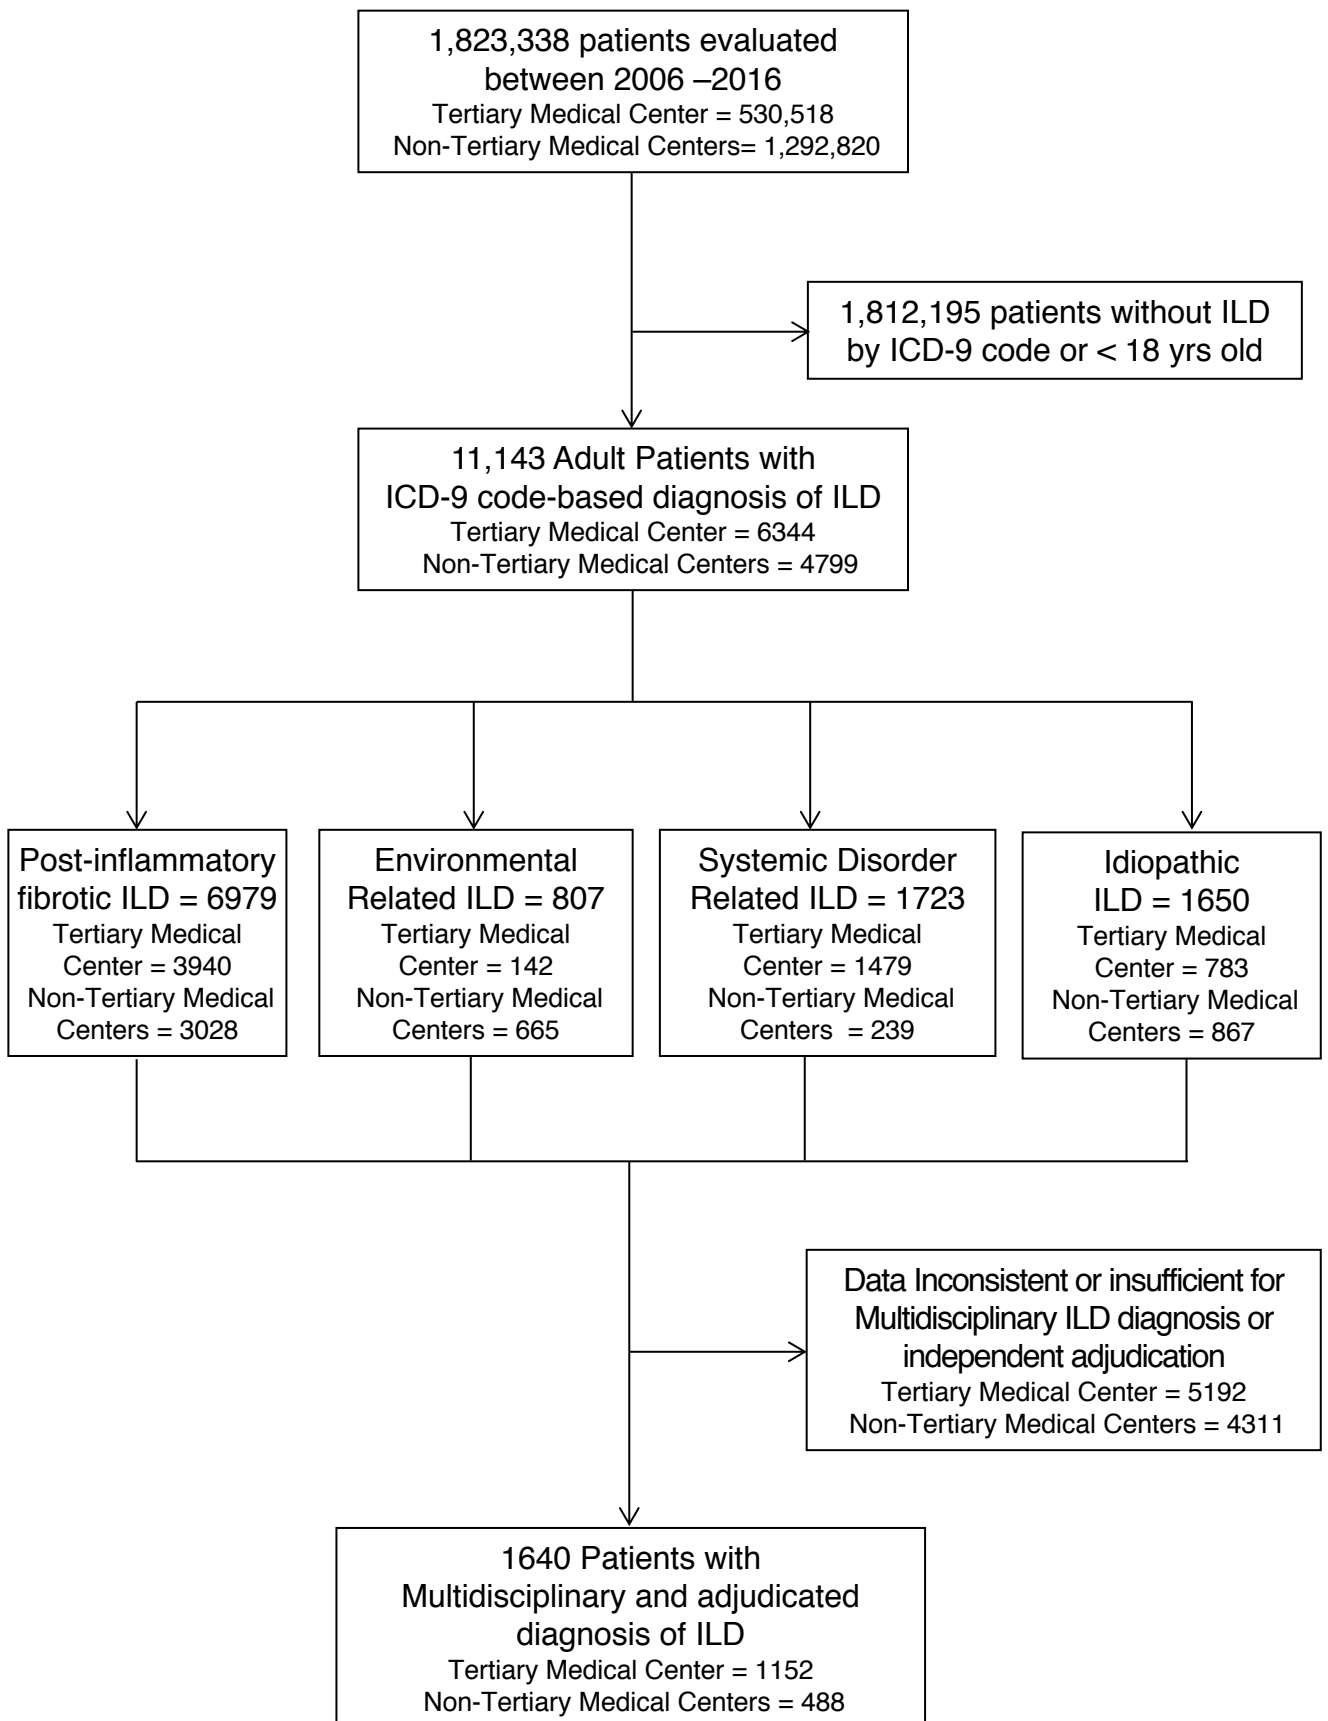

**Figure E1.** CONSORT diagram

**A.**

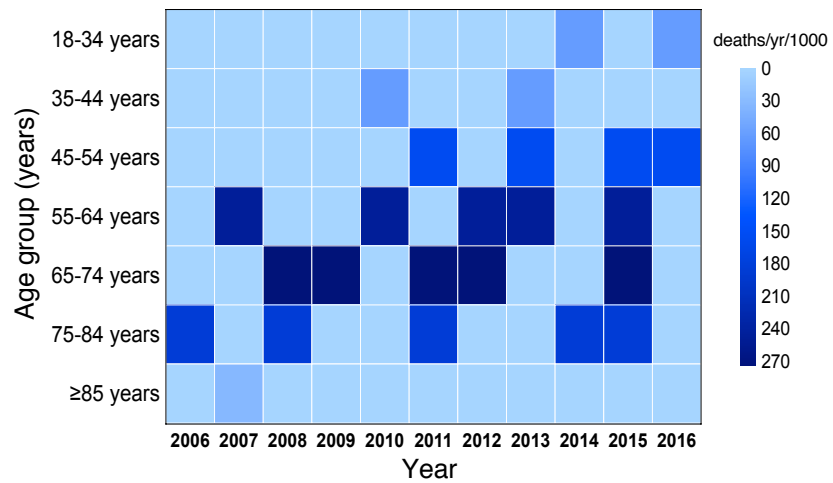

**Figure E2.** Age-standardized annual mortality rates (AMR) among African-American patients with multidisciplinary (MDD) and adjudicated diagnosis of ILD stratified by age group; population AMR depicted per thousand patients with ILD.



**A.**

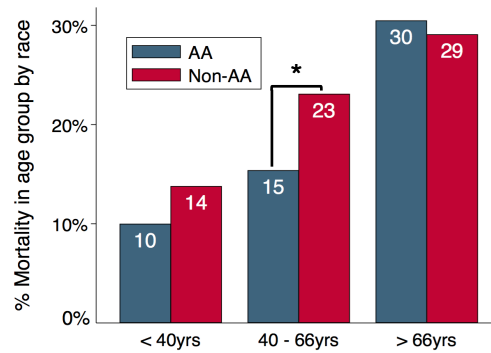

**B.**

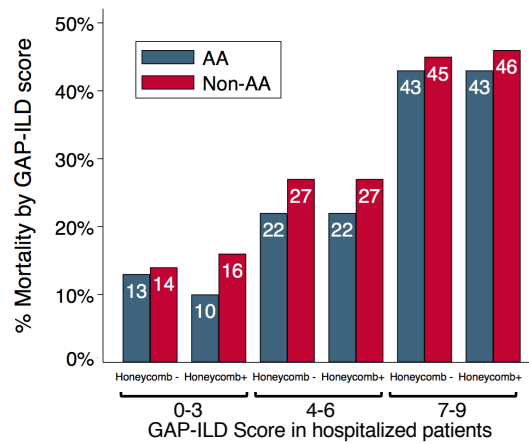

**C.**

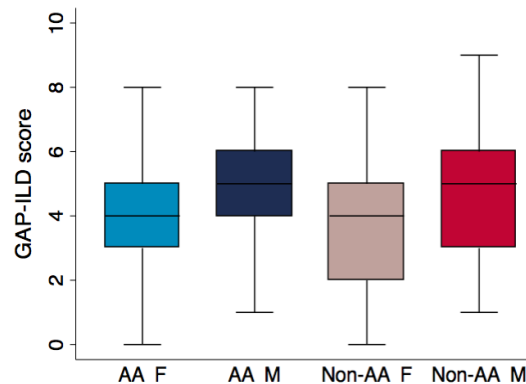

**Figure E3 (a)** Percentage distribution of mortality in multidisciplinary (MDD) and adjudicated ILD cohort stratified by age group and race. Percentage distribution of **(b)** mortality in MDD and adjudicated ILD cohort substratified by race, radiographic honeycombing and GAP-ILD score; and **(c)** distribution of GAP-ILD score stratified by race and gender. AA=African-American; ILD=interstitial lung disease; GAP=gender, age, physiology. \*P<0.05.
